# Supplementary material for: Implementation of antiretroviral therapy guidelines for under-five children in Tanzania: translating recommendations into practice
Source: PubMed Central journal article supplement (PMC4685962; doi:10.7448/ias.18.1.20303), 2015-12-18
Supplement: JIAS-18-20303-s001.pdf [file JIAS-18-20303-s001.pdf]

**Supplemental Tables:** Implementation of antiretroviral therapy guidelines for children under 5 years in Tanzania

Table S1: Factors associated with being ART eligible at enrollment among HIV-infected children 12-59 months enrolled in HIV care between 2010 and 2012 in Tanzania (N=1210)

|                           | univariate |           | multivariate |                |
|---------------------------|------------|-----------|--------------|----------------|
|                           | crude OR   | 95% CI    | AOR          | 95% CI         |
| <b>Age category</b>       |            |           |              |                |
| 12-35 months              | 1.6        | 1.2-2.0   | <b>1.5</b>   | <b>1.2-2.0</b> |
| 36-59 months              | reference  |           | reference    | reference      |
| <b>Sex</b>                |            |           |              |                |
| Male                      | reference  |           | reference    |                |
| Female                    | 1.1        | 0.8-1.3   | 1.1          | 0.9-1.4        |
| <b>Enrolment year</b>     |            |           |              |                |
| 2010                      | reference  |           | reference    |                |
| 2011                      | 0.9        | 0.7-1.3   | 0.9          | 0.7-1.2        |
| 2012                      | 1.3        | 0.9-1.7   | 1.2          | 0.9-1.7        |
| <b>Point of entry</b>     |            |           |              |                |
| VCT                       | reference  |           | reference    |                |
| PMTCT                     | 1.2        | 0.9-1.7   | 1.2          | 0.9-1.6        |
| Inpatient                 | 2.0        | 1.4-2.8   | <b>2.2</b>   | <b>1.6-3.2</b> |
| Outpatient                | 1.1        | 0.7-1.6   | 1.2          | 0.8-1.9        |
| Other/unknown             | 1.3        | 0.9-2.0   | 1.4          | 0.9-2.2        |
| <b>Setting</b>            |            |           |              |                |
| Urban/semi-urban          | 1.9        | 1.2-2.9   | <b>2.1</b>   | <b>1.3-3.5</b> |
| Rural                     | reference  |           | reference    |                |
| <b>Facility type</b>      |            |           |              |                |
| Primary                   | 0.5        | (0.4-0.8) | 0.7          | 0.5-1.2        |
| Secondary/tertiary        | reference  |           | reference    |                |
| Private/others            | 1.0        | 0.6-1.6   | 1.6          | 0.9-2.6        |
| <b>CD4 machine onsite</b> | 0.6        | 0.4-0.8   | 0.7          | 0.5-1.1        |

*Note: Malnutrition, WHO stage and CD4 count excluded from model because they contribute to the definition of ART eligibility.*

**Table S2. Factors associated with pre-ART attrition among infants 0-11 months and children 12-59 months who enrolled at HIV clinics in Tanzania**

|                                         | 0-11 months<br>(n=469) |                         | 12-59 months<br>(n=1210) |                         |
|-----------------------------------------|------------------------|-------------------------|--------------------------|-------------------------|
|                                         | Crude SHR(95%<br>CI)   | Adjusted<br>SHR(95% CI) | Crude<br>SHR(95% CI)     | Adjusted<br>SHR(95% CI) |
| <b>Age category</b>                     |                        |                         |                          |                         |
| 12-35 months                            |                        |                         | 1.0 (0.8-1.3)            | 1.0 (0.8-1.3)           |
| 36-59 months                            |                        |                         | reference                | reference               |
| <b>Sex</b>                              |                        |                         |                          |                         |
| Male                                    | reference              | reference               | reference                | reference               |
| Female                                  | 0.9 (0.6-1.4)          | 1.0 (0.7-1.5)           | 1.2 (0.9-1.4)            | 1.2 (0.9-1.5)           |
| <b>Malnutrition*</b>                    |                        |                         |                          |                         |
| Not Malnourished                        | reference              | reference               | reference                | reference               |
| Moderately malnourished                 | 1.1 (0.6-2.1)          | 1.0 (0.6-1.9)           | 0.9 (0.5-1.4)            | 0.8 (0.5-1.3)           |
| Severely malnourished                   | 1.1 (0.7-1.8)          | 1.4 (0.7-2.5)           | 1.4 (1.0-2.0)            | <b>1.4 (1.0-1.9)</b>    |
| <b>Enrolment year</b>                   |                        |                         |                          |                         |
| 2010                                    | reference              | reference               | reference                | reference               |
| 2011                                    | 0.6 (0.4-1.0)          | 0.7 (0.4-1.2)           | 0.7 (0.6-1.0)            | 0.8 (0.6-1.1)           |
| 2012                                    | 0.3 (0.2-0.6)          | <b>0.4 (0.2-0.8)</b>    | 0.4 (0.3-0.5)            | <b>0.4 (0.3-0.6)</b>    |
| <b>Missing enrolment CD4 cell count</b> | 1.5 (0.6-4.1)          | 2.5 (0.8-8.1)           | 1.8 (1.3-2.3)            | <b>2.0 (1.4-2.7)</b>    |
| <b>WHO Stage</b>                        |                        |                         |                          |                         |
| Stage I                                 | reference              | reference               | reference                | reference               |
| Stage II                                | 0.9 (0.5-1.4)          | 0.6 (0.4-1.1)           | 1.0 (0.7-1.4)            | 1.0 (0.7-1.4)           |
| Stage III                               | 1.0 (0.6-1.9)          | 0.8 (0.4-1.5)           | 0.7 (0.5-1.0)            | 0.7 (0.5-1.0)           |
| Stage IV                                | 1.3 (0.8-2.1)          | 0.6 (0.3-1.1)           | 1.5 (1.1-2.0)            | 1.1 (0.8-1.6)           |
| <b>Point of entry</b>                   |                        |                         |                          |                         |
| VCT                                     | reference              | reference               | reference                | reference               |
| PMTCT                                   | 0.5 (0.3-0.9)          | 0.5 (0.3-0.9)           | 0.8 (0.4-1.5)            | 0.7 (0.4-1.2)           |
| Inpatient                               | 1.0 (0.5-1.8)          | 1.4 (0.8-2.4)           | 1.7 (1.2-2.4)            | 1.3 (0.8-2.2)           |
| Outpatient                              | 0.6 (0.4-1.1)          | 0.7 (0.4-1.2)           | 1.3 (1.0-1.8)            | <b>1.6 (1.1-2.2)</b>    |
| Other/unknown                           | 0.5 (0.1-1.6)          | 0.5 (0.2-1.6)           | 0.8 (0.4-1.5)            | 0.9 (0.5-1.6)           |
| <b>Location</b>                         |                        |                         |                          |                         |
| Urban/semi-urban                        | 1.4 (0.9-2.4)          | 1.1 (0.5-2.3)           | 1.6 (1.0-2.5)            | 1.6 (0.8-3.2)           |
| Rural                                   | reference              | reference               | reference                | reference               |
| <b>Facility type</b>                    |                        |                         |                          |                         |
| primary                                 | 0.9 (0.5-1.4)          | 0.8 (0.5-1.5)           | 0.7 (0.5-1.0)            | 0.7 (0.4-1.2)           |
| private and others                      | 0.4 (0.4-0.7)          | <b>0.4 (0.2-0.8)</b>    | 0.6 (0.4-1.0)            | 0.8 (0.5-1.2)           |
| secondary/tertiary                      | reference              | reference               | reference                | reference               |
| <b>CD4 machine onsite</b>               |                        |                         |                          |                         |
| available onsite                        | reference              | reference               | reference                | reference               |
| available offsite                       | 0.8 (0.5-1.4)          | 1.0 (0.5-1.8)           | 1.0 (0.6-1.6)            | 1.0 (0.6-1.6)           |
| <b>Nutritional support</b>              | 1.3 (0.7-2.4)          | 1.3 (0.7-2.5)           | 0.9 (0.5-1.4)            | 0.9 (0.5-1.4)           |
| <b>Outreach</b>                         | 1.8 (1.1-3.0)          | 1.5 (0.9-2.3)           | 0.9 (0.5-1.6)            | 0.9 (0.5-1.6)           |

\*Not Malnourished (Z score  $\geq -2$ ); Moderately malnourished (Z score -2 to -3); Severely malnourished (Z score  $\leq -3$ )
